# Supplementary material
Source: HighWire-hosted journal article supplement (https://www.rcpjournals.org/highwire/filestream/13807/field_highwire_adjunct_files/2/Vardy_Supplementary_material_S3.pdf)
Supplement: Vardy_Supplementary_material_S3.pdf [file Vardy_Supplementary_material_S3.pdf]

**Supplementary material S3: Community Team components, coverage and scope**

| <b>Team</b>                                | <b>Staffing</b>                                                                                                                                              | <b>Coverage</b>                                                                                      | <b>Staff skills in relation to the pilot</b>    | <b>Referrals received from</b>                                                         | <b>Service on offer</b>                                                                                                                               | <b>Support offered in relation to the pilot</b>     |
|--------------------------------------------|--------------------------------------------------------------------------------------------------------------------------------------------------------------|------------------------------------------------------------------------------------------------------|-------------------------------------------------|----------------------------------------------------------------------------------------|-------------------------------------------------------------------------------------------------------------------------------------------------------|-----------------------------------------------------|
| <b>Site A:</b><br>Admission Avoidance Team | Advanced clinical practitioners (ACP), nurses, Occupational therapist (OT), Physiotherapy<br><b>Trained as part of the pilot and using the toolkit:</b> ACPs | All site A GPs<br>At home and in care homes                                                          | Venepuncture<br>non-medical prescribing         | GPs, Emergency department (ED) and inpatient wards, urgent care teams, crisis response | Hospital admission avoidance 72 hours after which time the reablement services or other appropriate care will take over alongside therapy/rehab input | Nursing reviews, aids and adaptations, Step up beds |
| <b>Site D:</b><br>Intermediate Care team   | All staff trained as part of the pilot – Advanced Nurse Practitioner (ANP), nurses, OTs, Physiotherapy, Health Care Assistant (HCA) Access to GP             | In reach nursing and residential beds and home pathway beds (community patients). Central Manchester | Venepuncture<br>Prescribing                     | GPs, Hospital                                                                          | Intermediate care<br>Work closely with discharge to assess, home pathways                                                                             |                                                     |
| <b>Site F:</b><br>Urgent Care Team         | Advanced Practitioners, nurses, OTs, Physiotherapists                                                                                                        | All site F GPs                                                                                       | Venepuncture<br>ECGs<br>non-medical prescribing | GPs, ED and inpatient wards, crisis response                                           | Hospital admission avoidance<br>Discharge home pathway                                                                                                | Nursing reviews, aids and adaptations, Step up beds |
| <b>Site G:</b><br>Primary Care Network     | 25 District Nurses; Neighbourhood ACP, Matron; 20 Crisis response; 2 Community Psychiatric nurses (CPN). Adult Social Care (ASC) neighbourhood               | 5 GP practices, 1 Primary Care network (PCN). Patients at home only as part of the pilot.            | Venepuncture<br>ECG<br>non-medical prescribing  | GPs, ED and inpatient wards, urgent care teams, crisis response, ASC                   | Hospital admission avoidance                                                                                                                          |                                                     |

|                                    |                                                                                                                                                                                                                                                             |                                                        |                                                 |                                                                                                                          |                                                                                                                                         |                                                                                            |
|------------------------------------|-------------------------------------------------------------------------------------------------------------------------------------------------------------------------------------------------------------------------------------------------------------|--------------------------------------------------------|-------------------------------------------------|--------------------------------------------------------------------------------------------------------------------------|-----------------------------------------------------------------------------------------------------------------------------------------|--------------------------------------------------------------------------------------------|
|                                    | LCO, 5 GP practices<br><b>Trained as part of the pilot &amp; using the toolkit:</b> All DNs, ACP, Matron, CPNs, Crisis response team                                                                                                                        |                                                        |                                                 |                                                                                                                          |                                                                                                                                         |                                                                                            |
| <b>Site I:</b><br>Urgent Care Team | Nurses (Band 5, 6, 7, 8), Health Care Assistants (HCA), medicine manager<br>Access to Allied Health Professionals and Social Services<br><b>Trained as part of the pilot and using the toolkit:</b> All nurses, HCAs (trained and had the delirium leaflet) | All site I GPs.<br>Patients at home and in care homes. | Venepuncture<br>ECGs<br>non-medical prescribing | GPs, ED and inpatient wards, Ambulance service, social workers, District Nurses, MacMillan nurses, crisis response, AHPs | Urgent - hospital admission avoidance.<br>Routine - Chronic condition management, proactive engagement with frequent hospital attenders | Nursing review, HCA support, access to social services, aids and adaptations, Step up beds |

Abbreviations: ACP=advanced clinical practitioner, ANP=advanced nurse practitioner, ASC=adult social care, ED=emergency department, HCA=healthcare assistant, LCO=local care organisation, OT=occupational therapist.
